# Supplementary material for: Solvatochromism of bright carbon dots with tunable long-wavelength emission from green to red and their application as solid-state materials for warm WLEDs
Source: Royal Society of Chemistry journal article supplement (doi:10.1039/c7ra07736j), 2017-01-01
Supplement: c7ra07736j1.pdf [file c7ra07736j1.pdf]

## Supplementary Material

### Bright “solvatochromism” carbon dots with tunable long-wavelength emission from green to red and their solid materials for warm WLEDs

Sai Lin, Chun Lin, Meiling He, Rongrong Yuan, Yijun Zhang, Yongqiang Zhou, Weidong Xiang\*,

Xiaojuan Liang\*

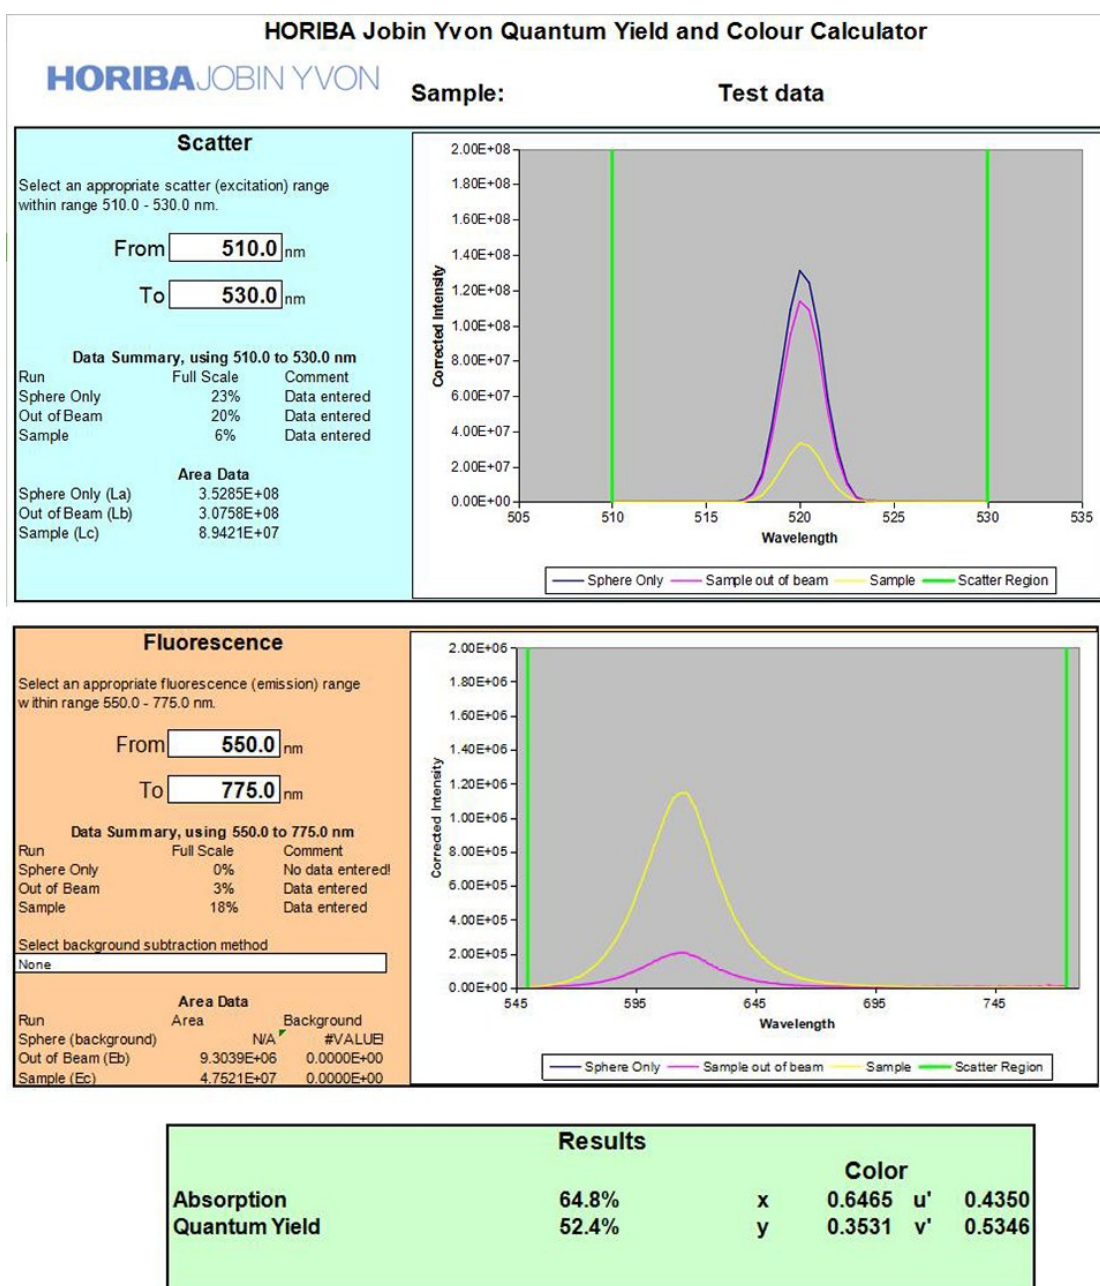

Fig.S1 The raw data of QY of P-CDs

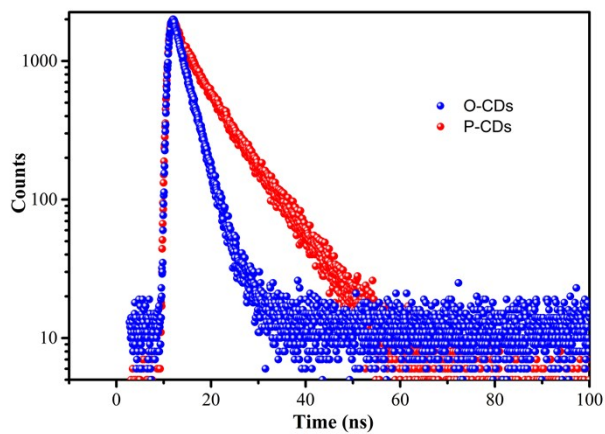

Fig.S2 The PL lifetime of the two samples

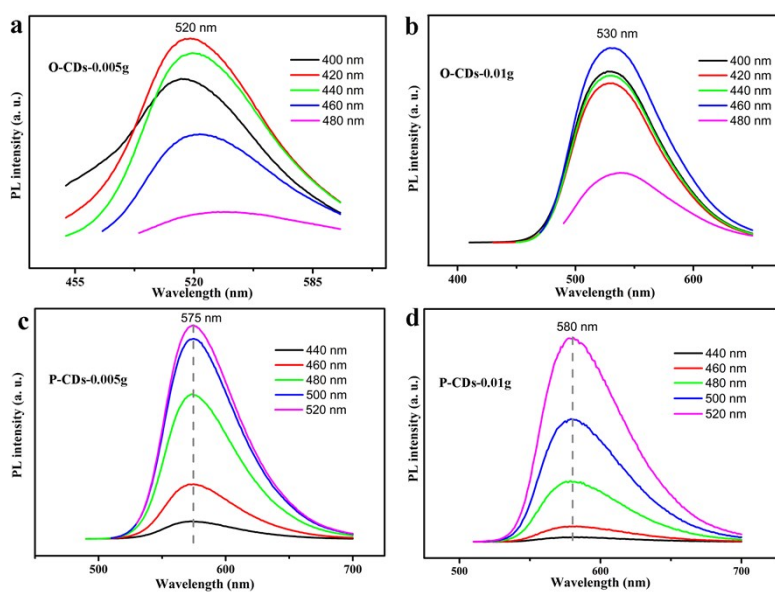

Fig.S3 The PL spectra of different concentration of o-phenylenediamine and p-phenylenediamine

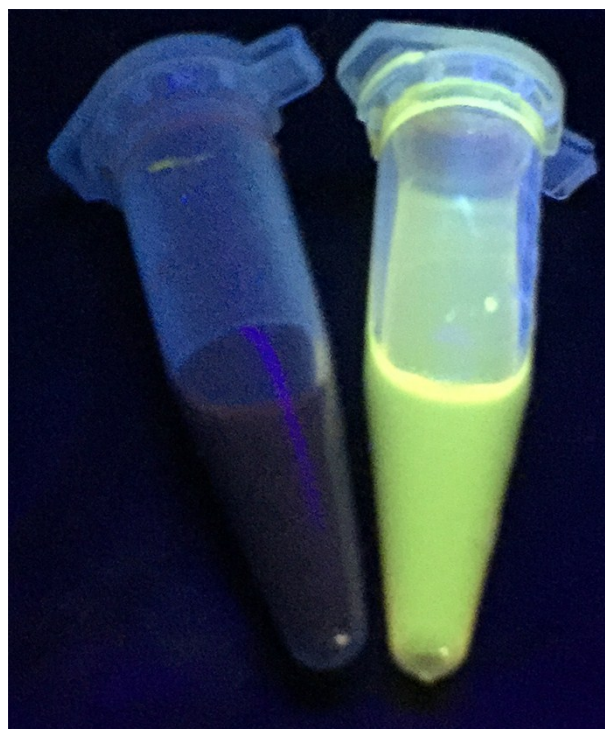

Fig. S4 The picture of CDs under UV light. The left one is CDs derived from 0.1 g p-phenylenediamine, while the right one is CDs come from 0.1 g o-phenylenediamine.

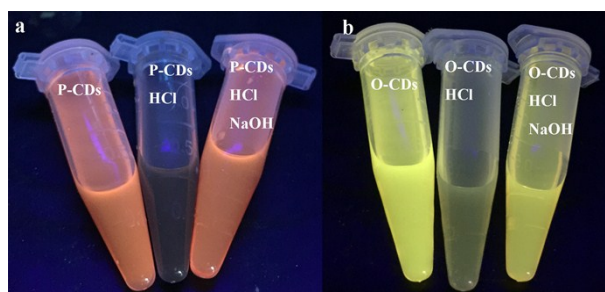

Fig.S5 (a) (b) Photograph of P-CD, P-CDs/HCl and P-CDs/HCl/NaOH, O-CDs. O-CDs/HCl, O-CDs/HCl/NaOH respectively (from left to right).

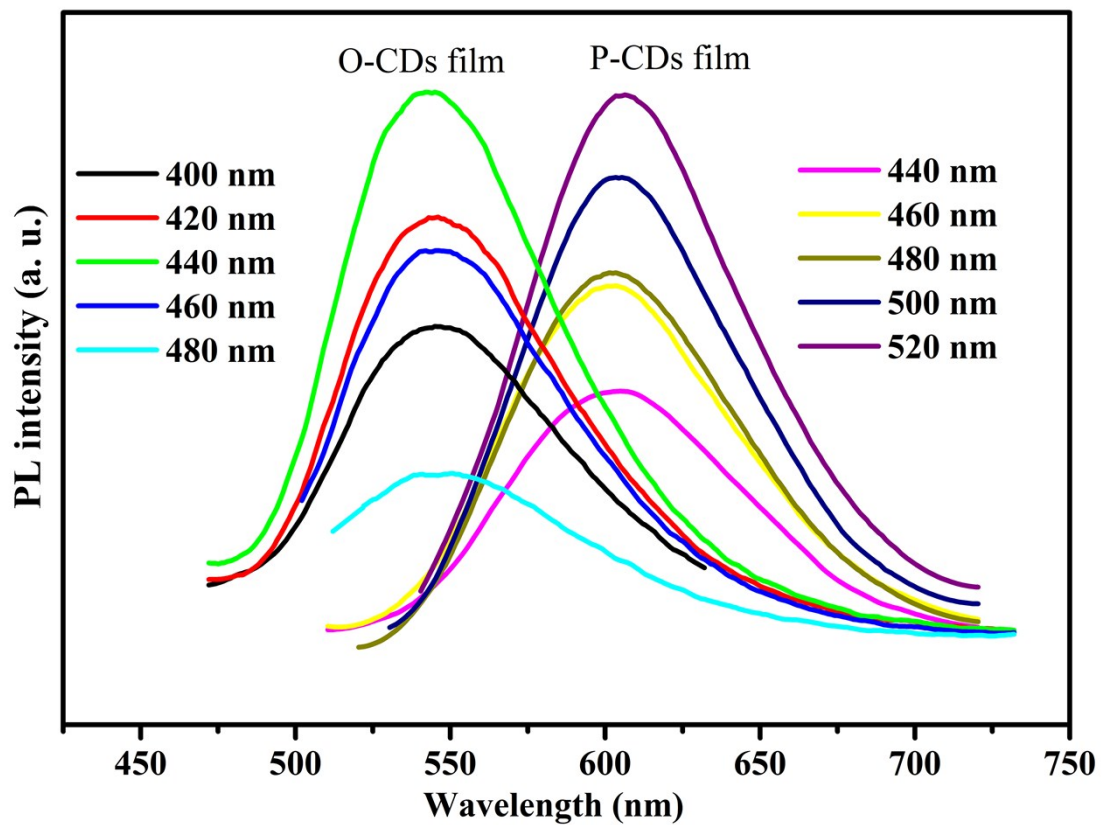

Fig.S6 The PL images of O-CDs film and P-CDs film



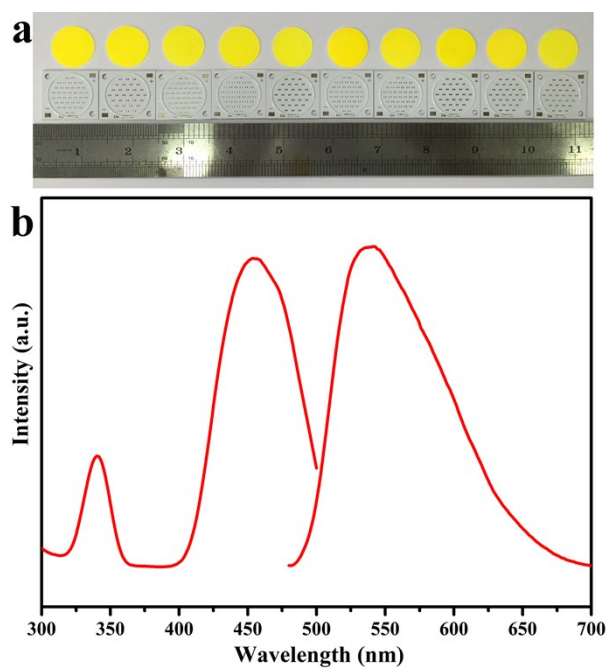

Fig.S9 (a) the photograph of Ce:PiG; (b) the PLE and PL spectra of Ce: PiG.

Table.S1 The QY of CDs dissolved in DMF and water.

| Sample | DMF (QY) | Water (QY) |
|--------|----------|------------|
| P-CDs  | 52.4%    | 34.7%      |
| O-CDs  | 58.8%    | 55.3%      |
